# Supplementary material
Source: PubMed Central journal article supplement (PMC5568928)

# Supplementary Material, Figure S1

## RNAscope

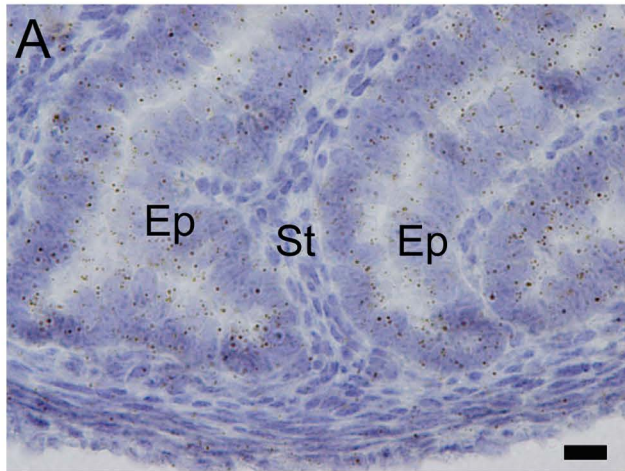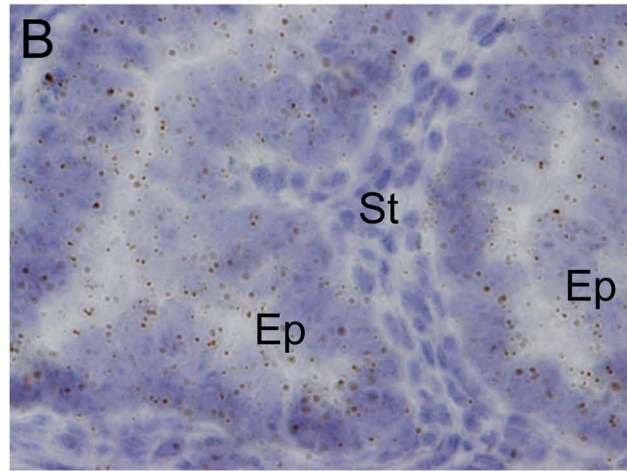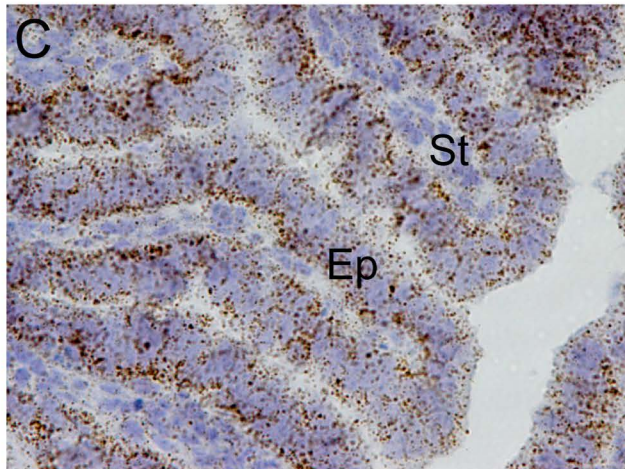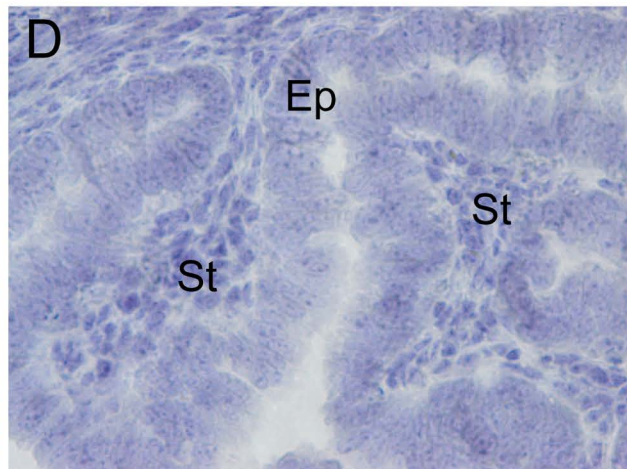



# Supplementary Material, Figure S3

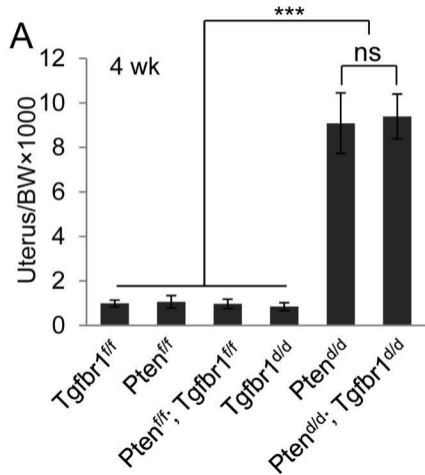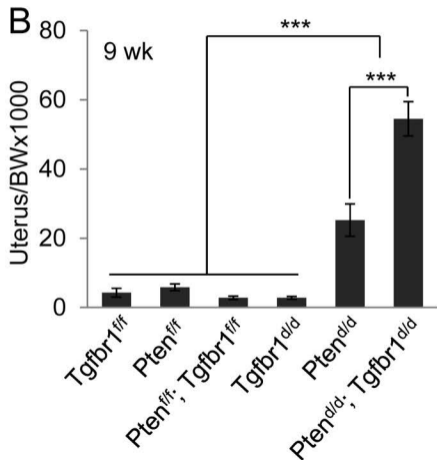

# Supplementary Material, Figure S4

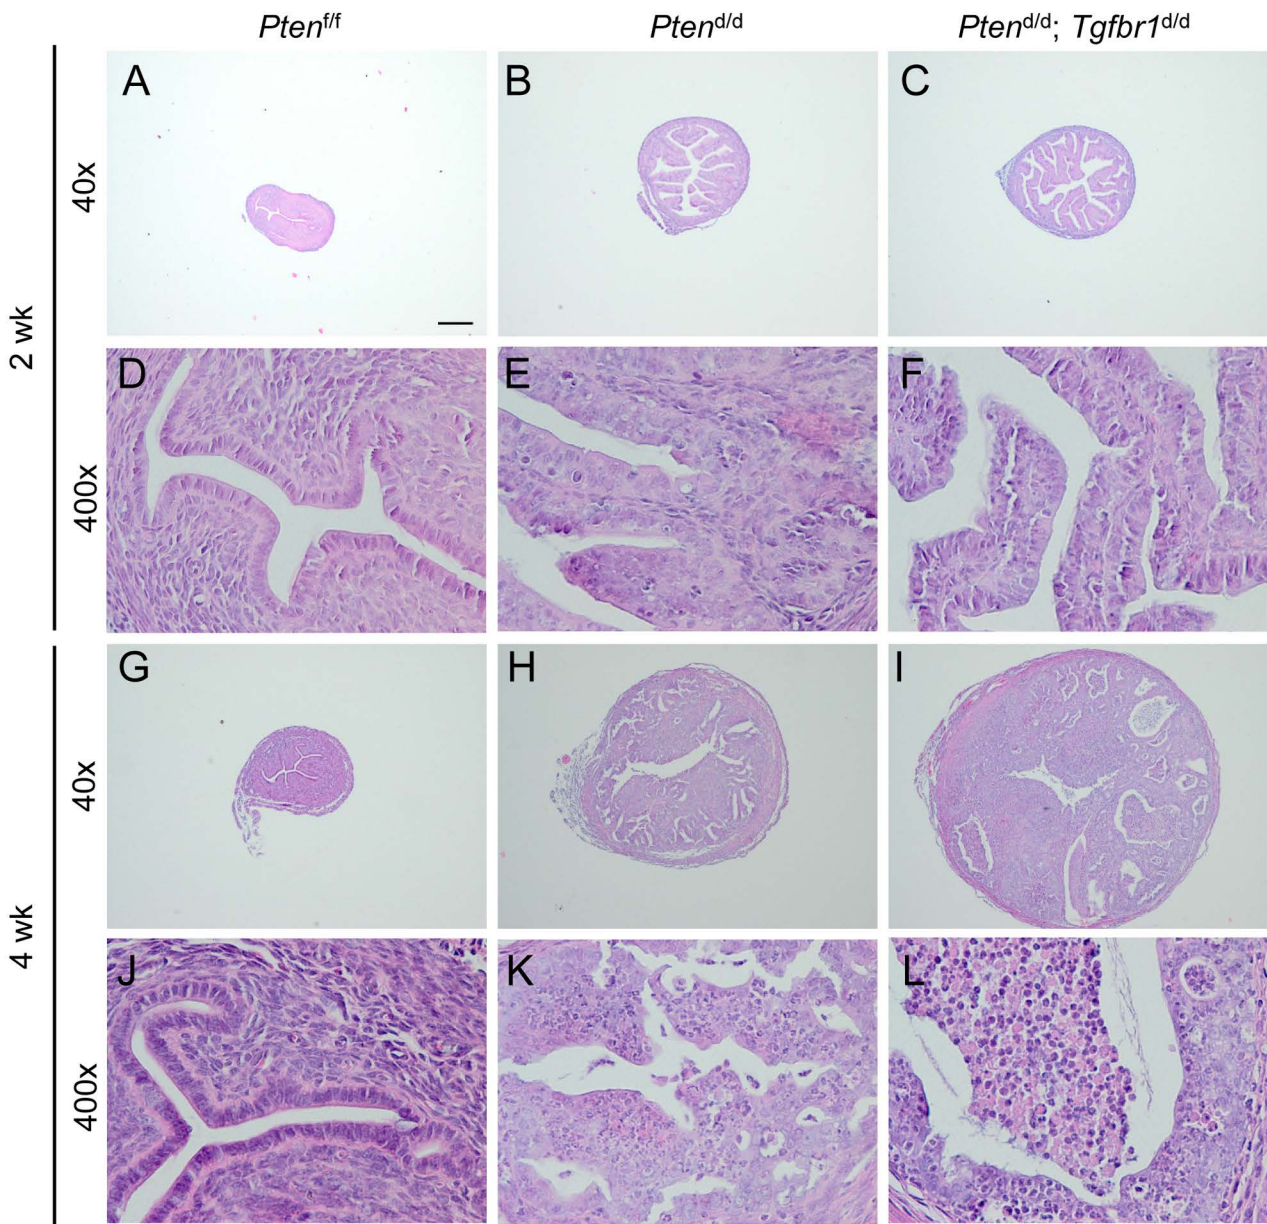

# Supplementary Material, Figure S5

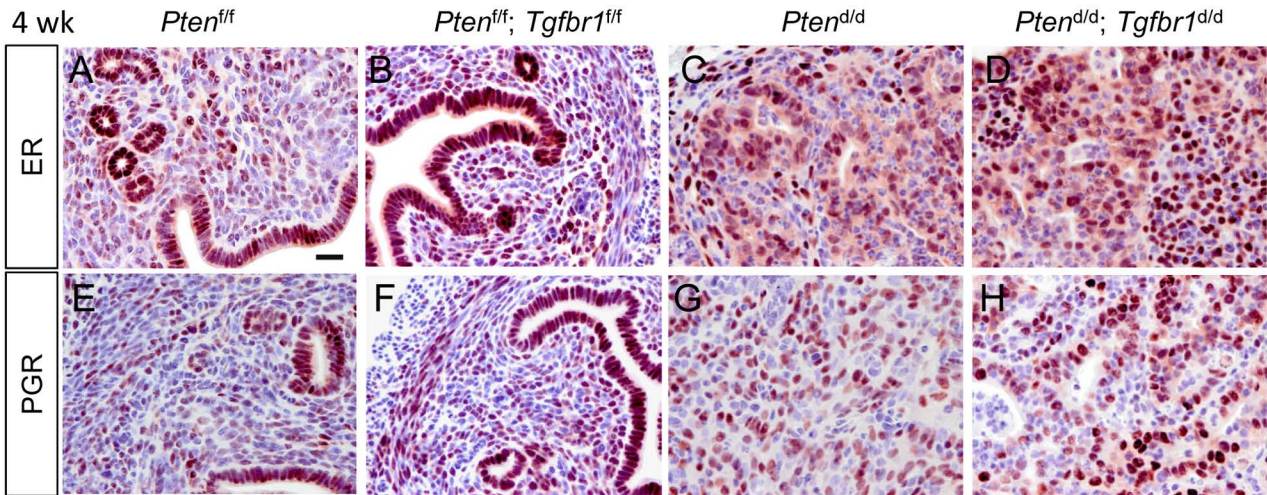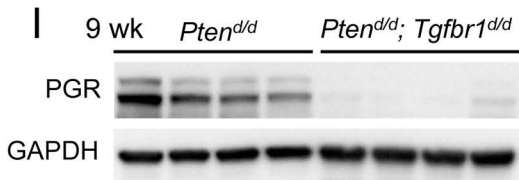

# Supplementary Material, Figure S6

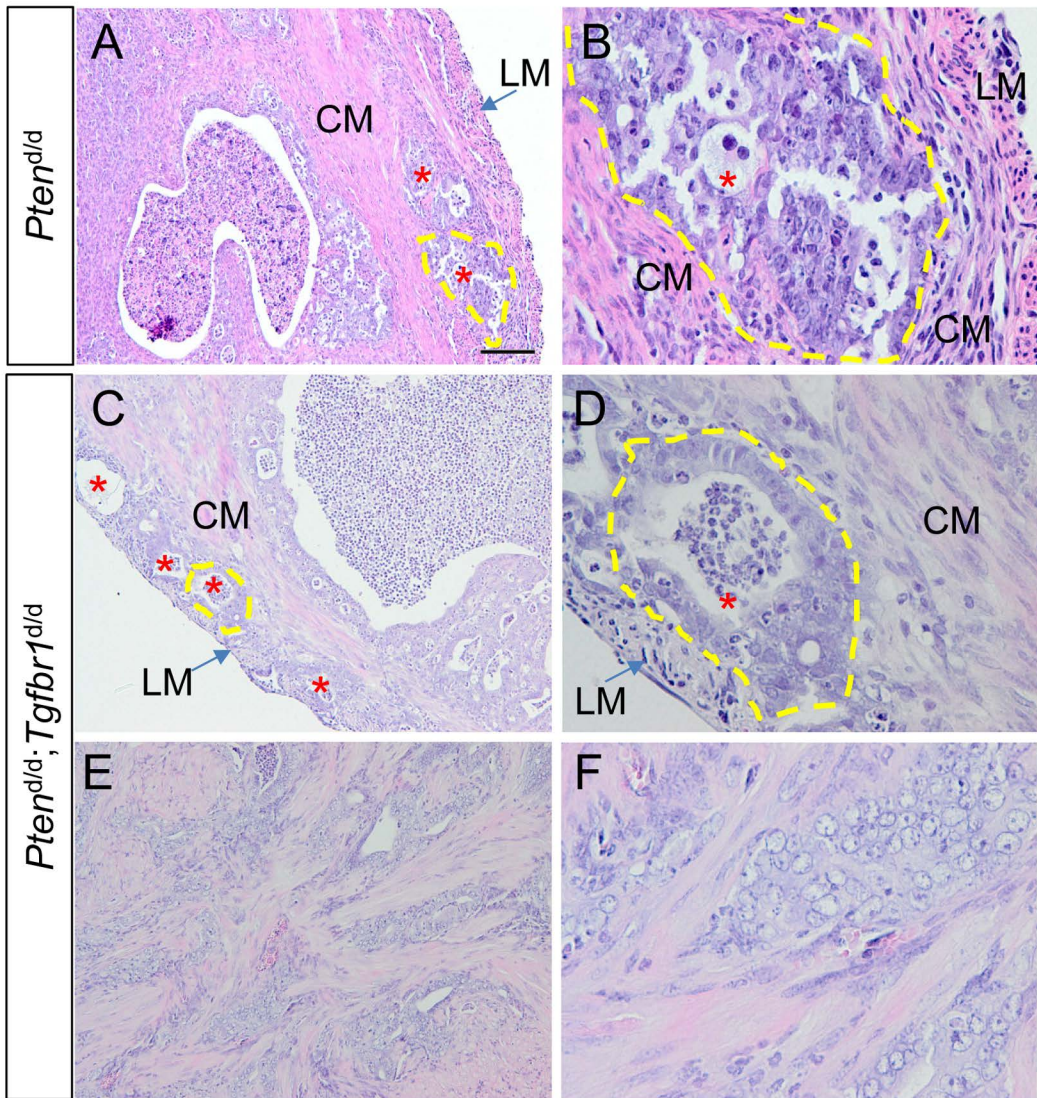

# Supplementary Material, Figure S7

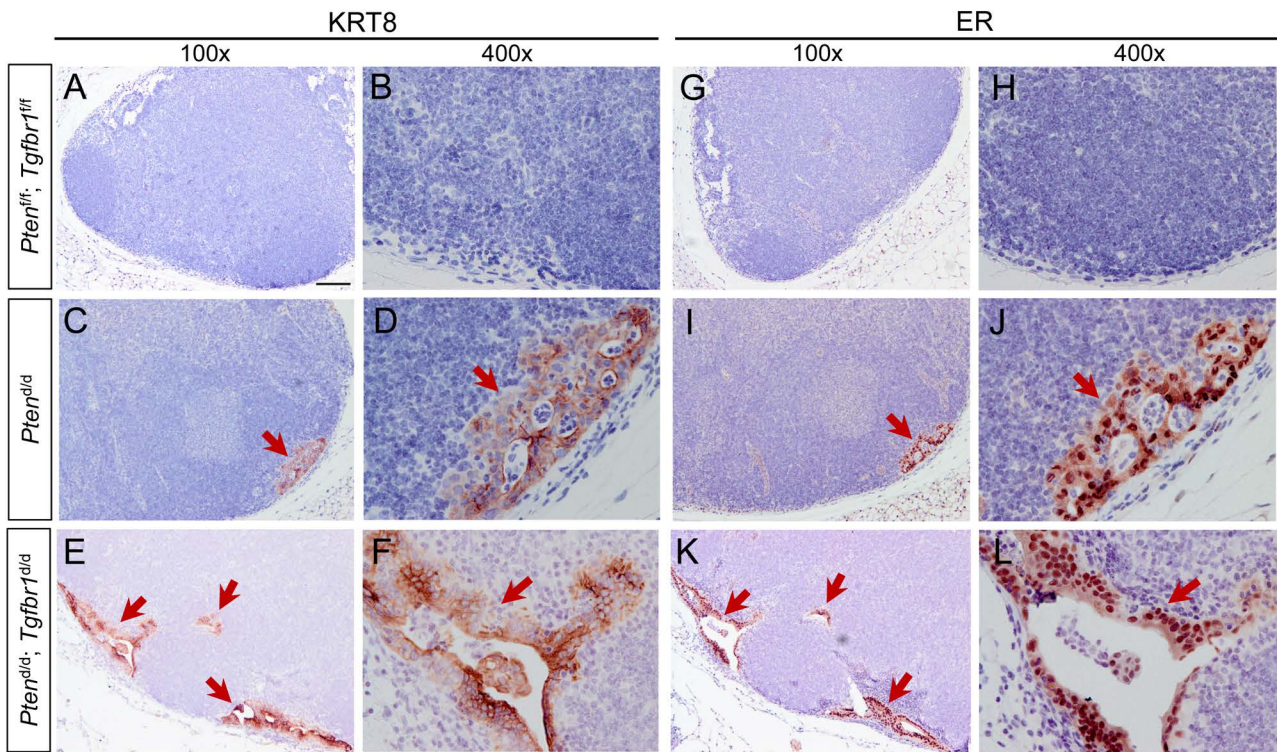

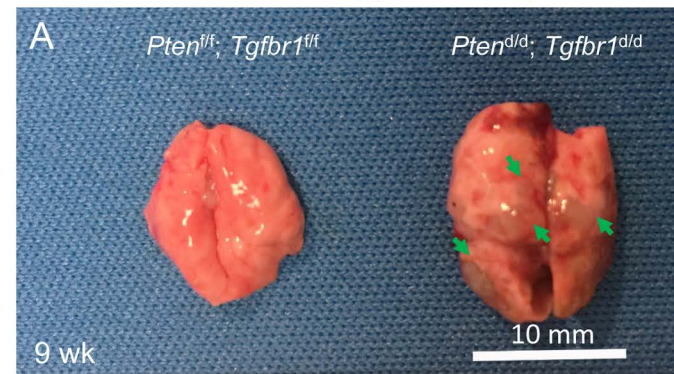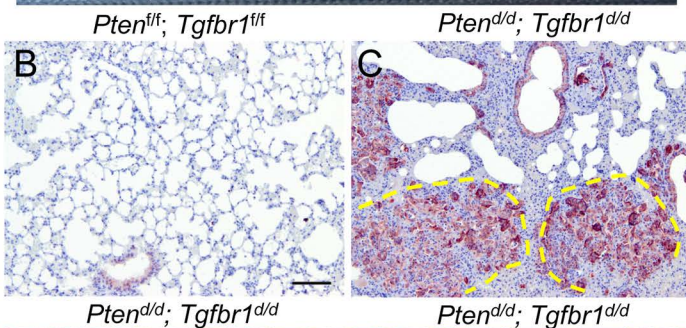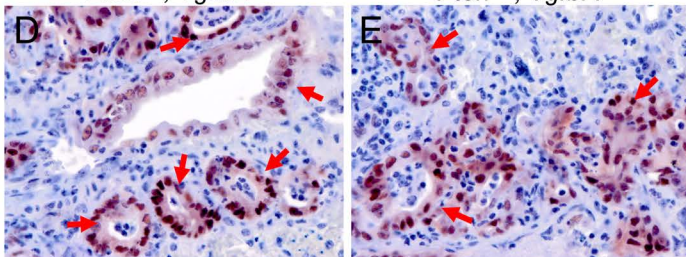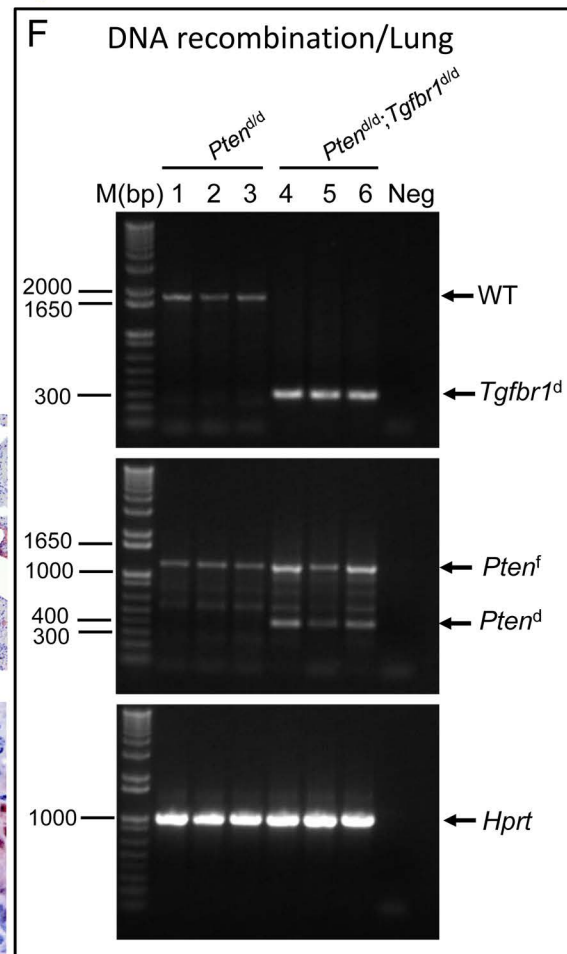



# Supplementary Material, Figure S9

F4/80

CD163

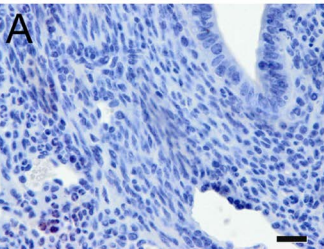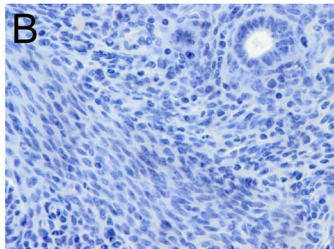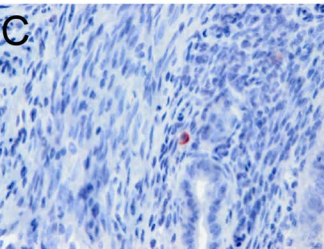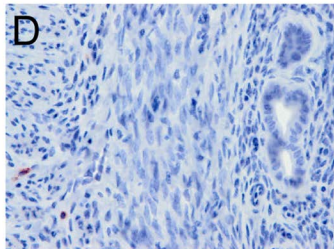

Supplement: NIHMS889620-supplement-Supp_FigS1-9.pdf [file NIHMS889620-supplement-Supp_FigS1-9.pdf]
